# Supplementary material for: Novel anti-VEGFR2 antibody-conjugated nanobubbles for targeted ultrasound molecular imaging in a rabbit VX2 hepatic tumor model
Source: Royal Society of Chemistry journal article supplement (doi:10.1039/d3tb01718d), 2023-01-01
Supplement: d3tb01718d1.pdf [file d3tb01718d1.pdf]

## Supplementary File

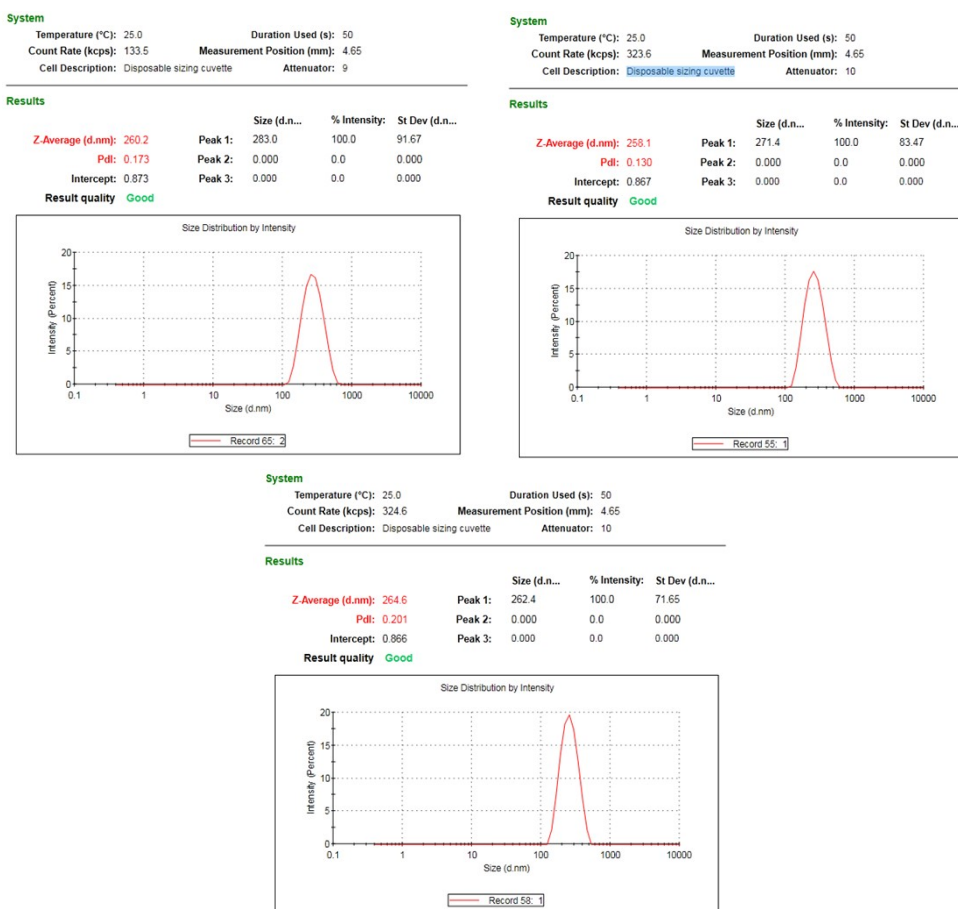

Figure S1 The size distribution curve and PDI of tNB<sub>S<sub>v</sub></sub>. (n = 3)

**Zeta Potential (mV): -12.4**  
**Zeta Deviation (mV): 5.47**  
**Conductivity (mS/cm): 0.0191**  
**Result quality Good**

|                      |       |      |
|----------------------|-------|------|
| <b>Peak 1:</b> -12.4 | 100.0 | 5.47 |
| <b>Peak 2:</b> 0.00  | 0.0   | 0.00 |
| <b>Peak 3:</b> 0.00  | 0.0   | 0.00 |

**Zeta Potential (mV): -13.3**  
**Zeta Deviation (mV): 5.59**  
**Conductivity (mS/cm): 0.00278**  
**Result quality Good**

|                      |       |      |
|----------------------|-------|------|
| <b>Peak 1:</b> -13.3 | 100.0 | 5.59 |
| <b>Peak 2:</b> 0.00  | 0.0   | 0.00 |
| <b>Peak 3:</b> 0.00  | 0.0   | 0.00 |

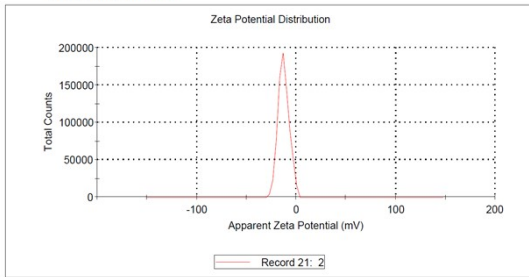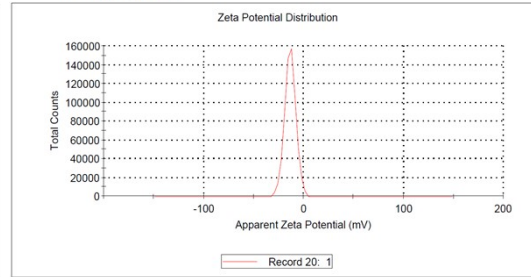

**Zeta Potential (mV): -12.1**  
**Zeta Deviation (mV): 5.68**  
**Conductivity (mS/cm): 0.00335**  
**Result quality Good**

|                      |       |      |
|----------------------|-------|------|
| <b>Peak 1:</b> -12.1 | 100.0 | 5.68 |
| <b>Peak 2:</b> 0.00  | 0.0   | 0.00 |
| <b>Peak 3:</b> 0.00  | 0.0   | 0.00 |

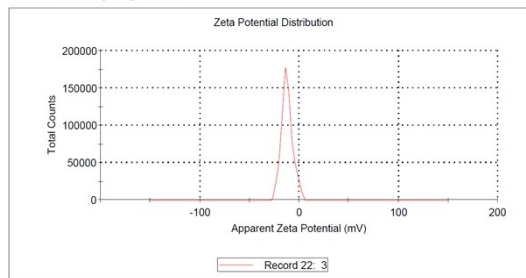

Figure S2 The zeta potential of tNBs<sub>v</sub>. (n = 3)
